# Supplementary material
Source: PubMed Central journal article supplement (PMC10330910)
Supplement: NIHMS1906491-supplement-1.pdf [file NIHMS1906491-supplement-1.pdf]

# Calcineurin Activity Assay

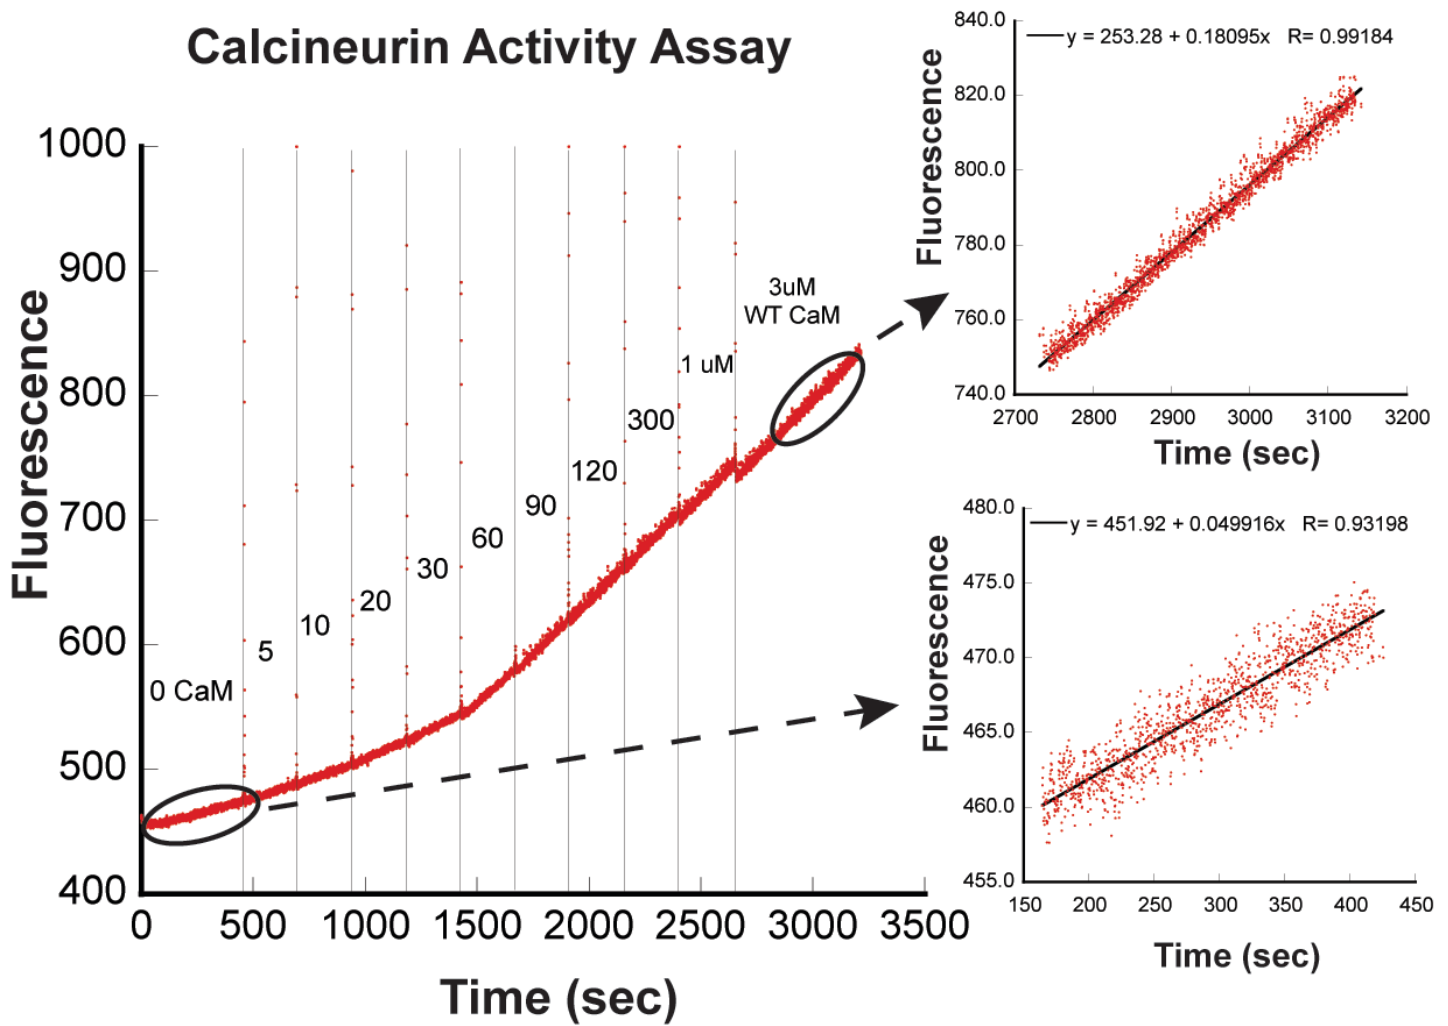

**Figure S1. Representative data set of CaN activity measurements.** Fluorescence intensity of MUPP substrate monitored during addition of CaM in the presence of 100  $\mu$ M  $\text{Ca}^{2+}$  and 150 nM CaN. Zoomed in regions at the start and end of the titration demonstrate linearity which is consistent with each condition being monitored at steady state. Each steady state measurement is fit to a linear line where the slope corresponds to CaN activity.

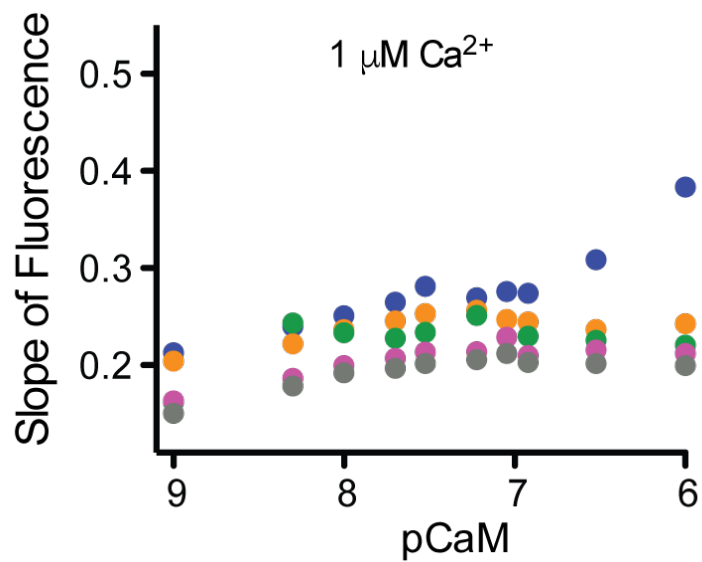

**Figure S2. Activation of CaN by CaM at 1  $\mu\text{M}$   $[\text{Ca}^{2+}]$ .** Data are color coded by CaM mutation identify (WT, N53I, F89L, D129G, and F141L).

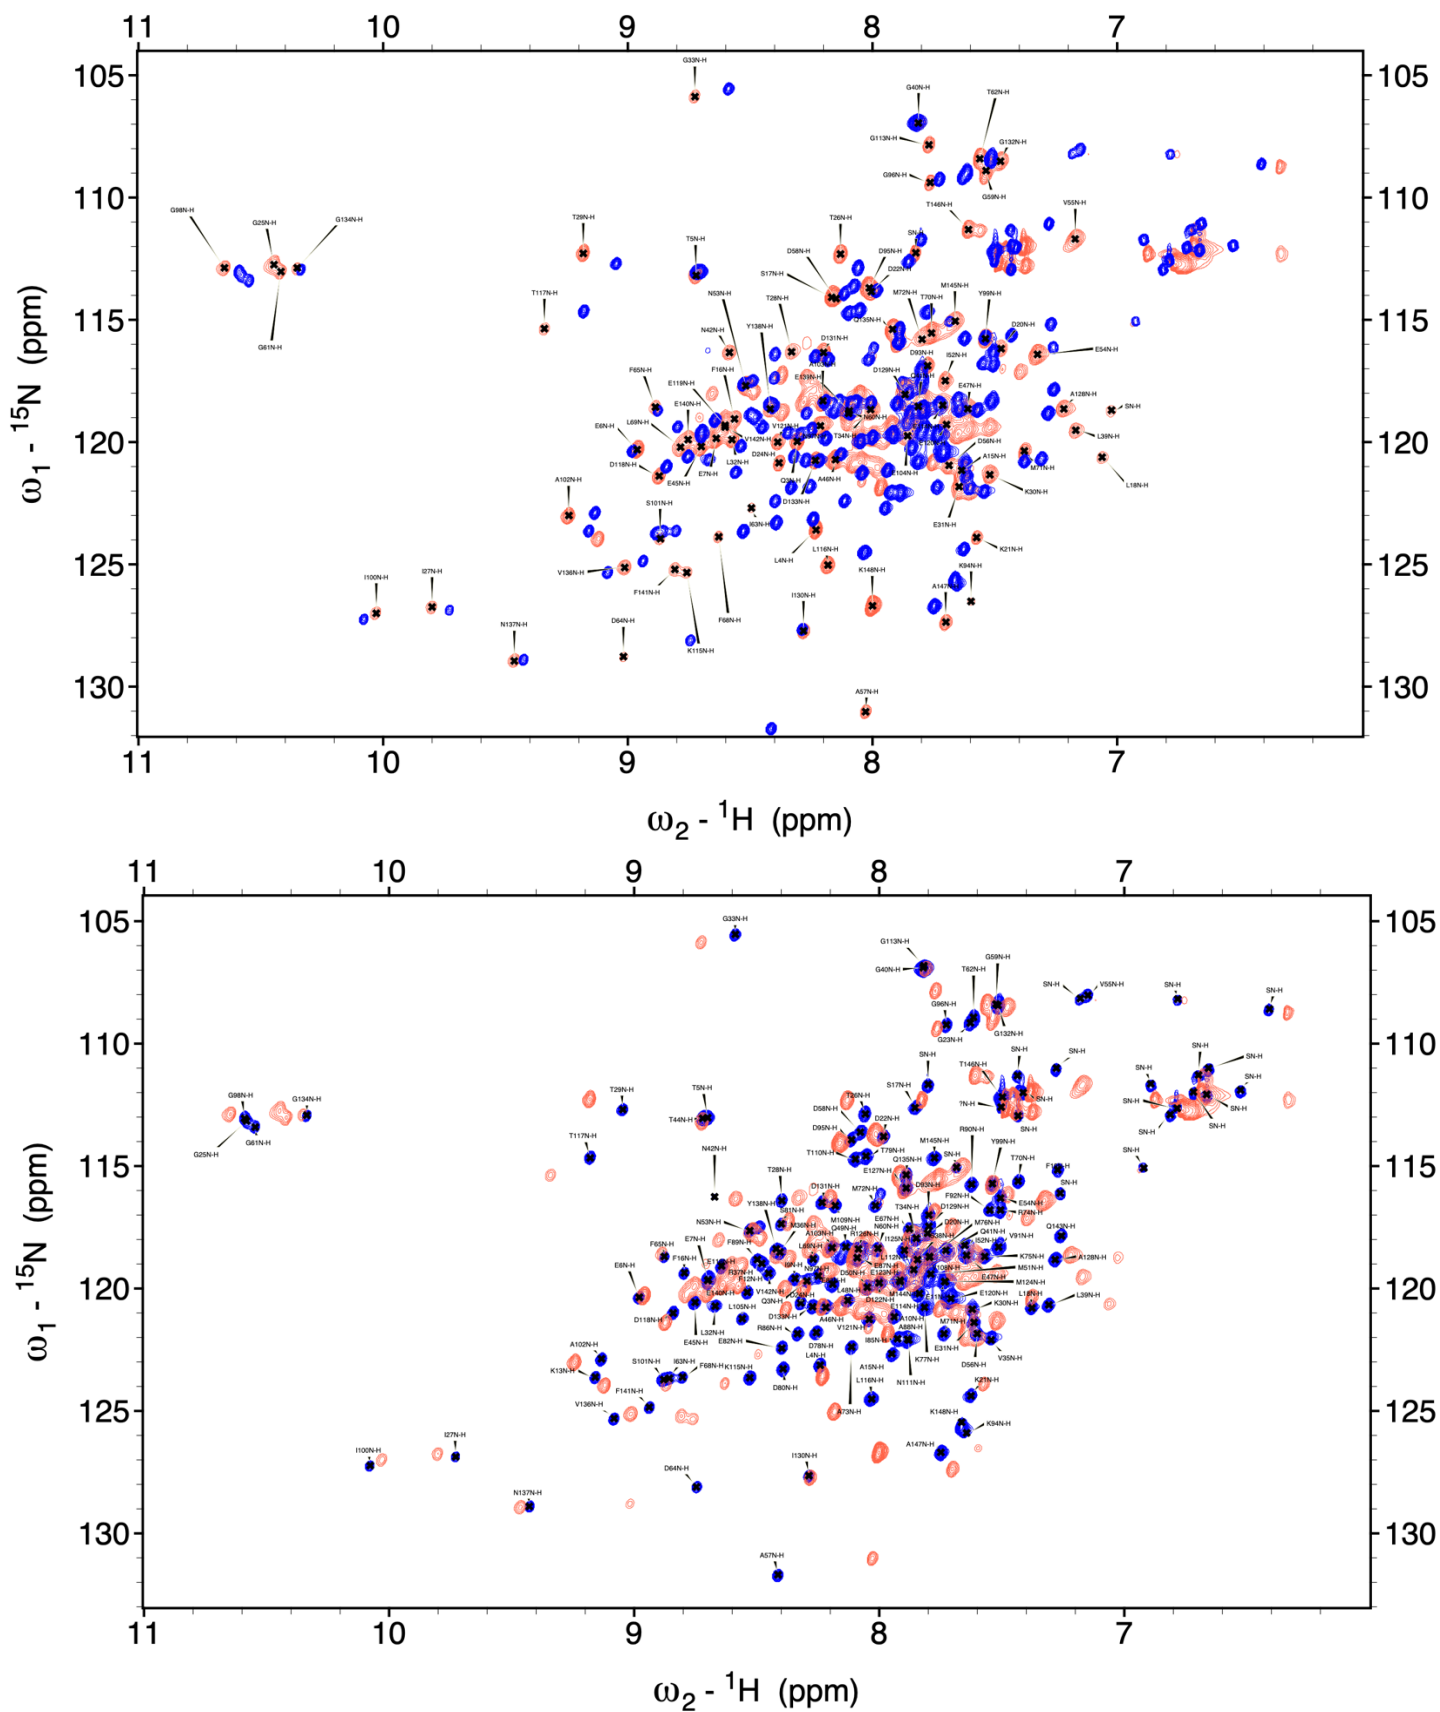

**Figure S3.**  $^1\text{H}$   $^{15}\text{N}$  HSQC spectra of isotopically enriched  $75\ \mu\text{M}$   $^{15}\text{N}$  **CaM-CaN peptide complex** (red) overlaid with  $75\ \mu\text{M}$   $^{15}\text{N}$  **WT CaM** (blue). Solution conditions were 50 mM HEPES, 100 mM KCl, 6 mM  $\text{CaCl}_2$ , pH 7.4 at 298K. Resonance frequency assignments shown for clearly resolved cross peaks of a) CaM-CaN peptide complex and b) WT CaM. Complete list of assigned data from analysis of mutant complexes shown in **Figure S4**.

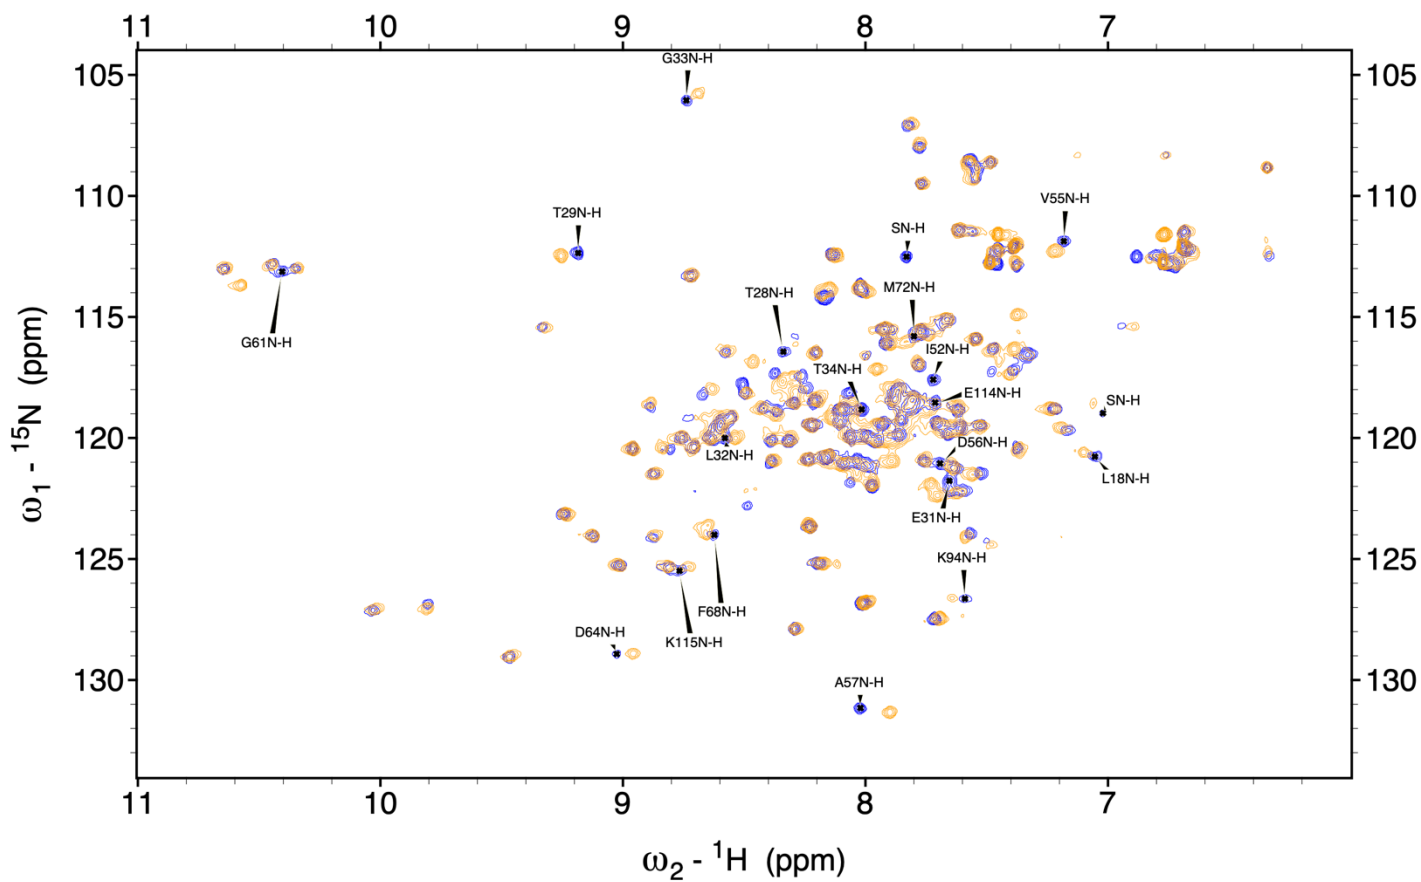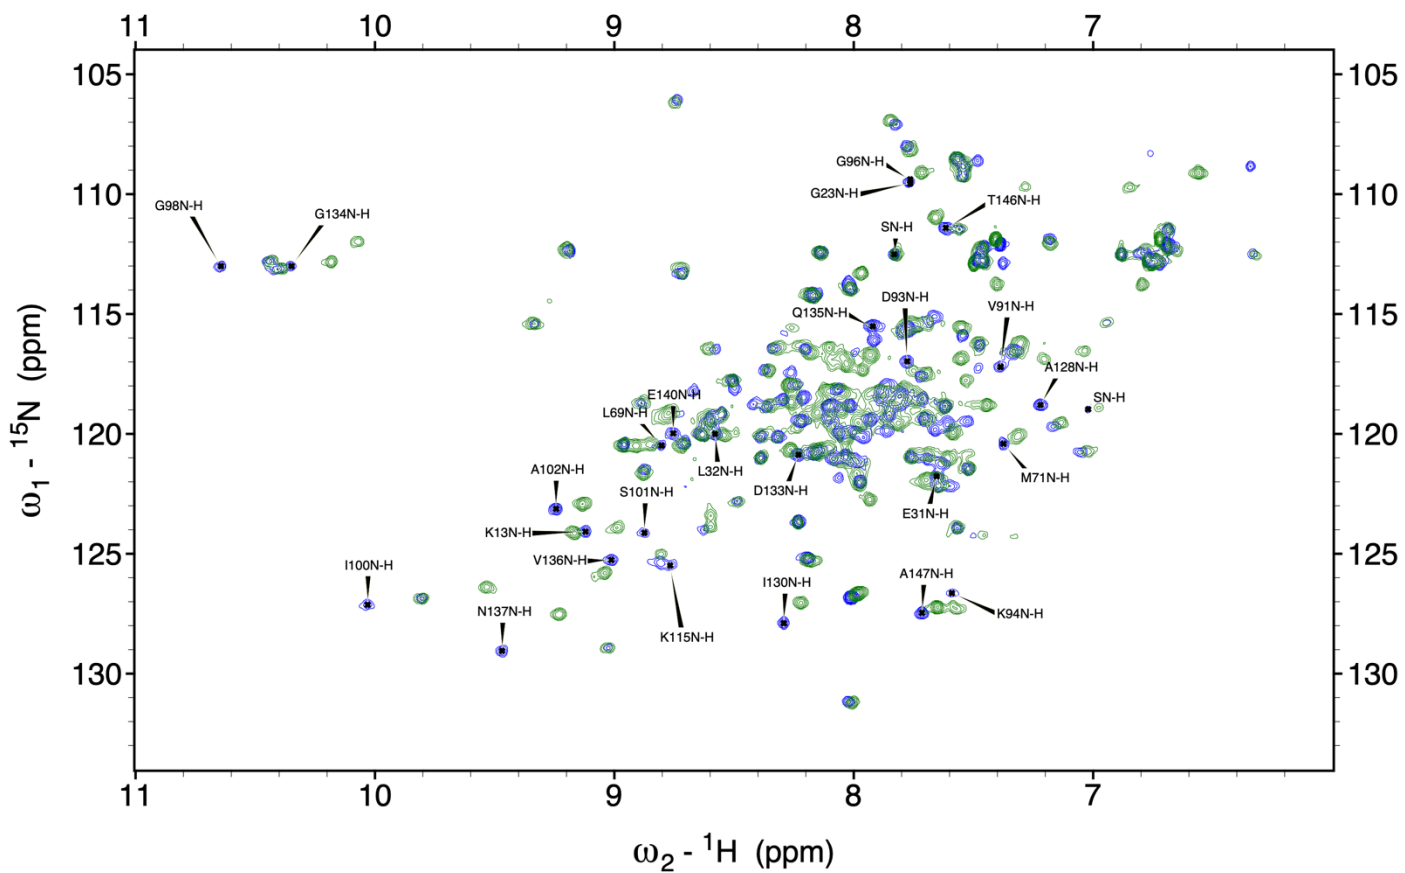

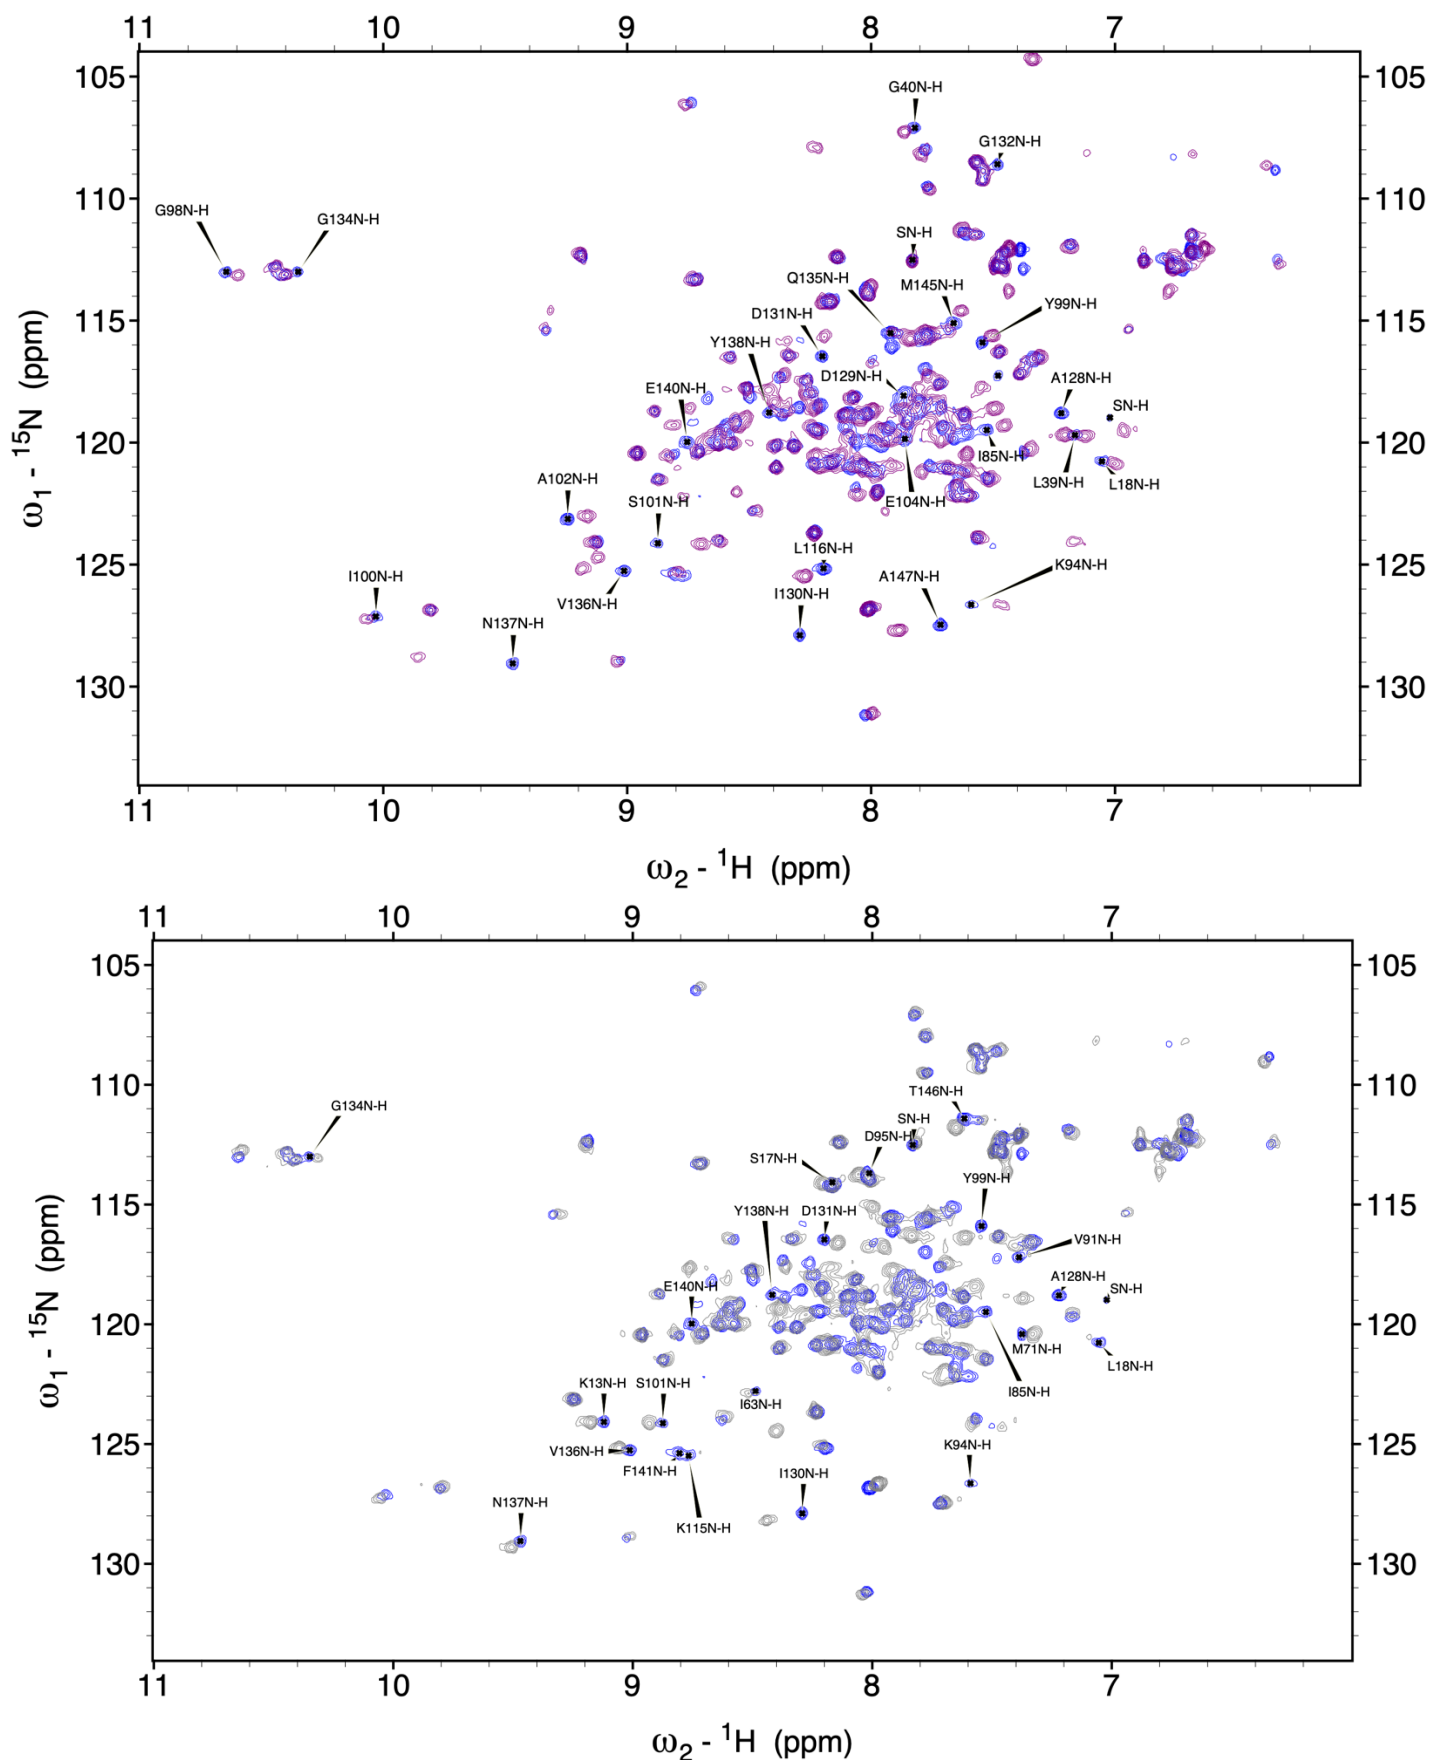

**Figure S4.** Overlays of  $^1\text{H}$ - $^{15}\text{N}$  HSQC NMR spectra of  $^{15}\text{N}$  WT CaM -CaN peptide complex compared to spectra of mutant CaM complexes at 80 :1  $[\text{Ca}^{2+}]$ : $[\text{protein}]$ . Labels are shown on each overlay for cross-peaks of amino acids where data could be clearly attribute to differences imparted each disease-associated mutation. SN-H indicates side chain. Spectra are color coded by CaM mutation identify (WT, N53I, F89L, D129G, and F141L).

| CaM | N53I | F89L | D129G | F141L |
|-----|------|------|-------|-------|
| A1  | A1   | A1   | A1    | A1    |
| D2  | D2   | D2   | D2    | D2    |
| Q3  | Q3   | Q3   | Q3    | Q3    |
| L4  | L4   | L4   | L4    | L4    |
| T5  | T5   | T5   | T5    | T5    |
| E6  | E6   | E6   | E6    | E6    |
| E7  | E7   | E7   | E7    | E7    |
| Q8  | Q8   | Q8   | Q8    | Q8    |
| I9  | I9   | I9   | I9    | I9    |
| A10 | A10  | A10  | A10   | A10   |
| E11 | E11  | E11  | E11   | E11   |
| F12 | F12  | F12  | F12   | F12   |
| K13 | K13  | K13  | K13   | K13   |
| E14 | E14  | E14  | E14   | E14   |
| A15 | A15  | A15  | A15   | A15   |
| F16 | F16  | F16  | F16   | F16   |
| S17 | S17  | S17  | S17   | S17   |
| L18 | L18  | L18  | L18   | L18   |
| F19 | F19  | F19  | F19   | F19   |
| D20 | D20  | D20  | D20   | D20   |
| K21 | K21  | K21  | K21   | K21   |
| D22 | D22  | D22  | D22   | D22   |
| G23 | G23  | G23  | G23   | G23   |
| D24 | D24  | D24  | D24   | D24   |
| G25 | G25  | G25  | G25   | G25   |
| T26 | T26  | T26  | T26   | T26   |
| I27 | I27  | I27  | I27   | I27   |
| T28 | T28  | T28  | T28   | T28   |
| T29 | T29  | T29  | T29   | T29   |
| K30 | K30  | K30  | K30   | K30   |
| E31 | E31  | E31  | E31   | E31   |
| L32 | L32  | L32  | L32   | L32   |
| G33 | G33  | G33  | G33   | G33   |
| T34 | T34  | T34  | T34   | T34   |
| V35 | V35  | V35  | V35   | V35   |
| M36 | M36  | M36  | M36   | M36   |
| R37 | R37  | R37  | R37   | R37   |
| S38 | S38  | S38  | S38   | S38   |
| L39 | L39  | L39  | L39   | L39   |
| G40 | G40  | G40  | G40   | G40   |
| Q41 | Q41  | Q41  | Q41   | Q41   |
| N42 | N42  | N42  | N42   | N42   |
| P43 | P43  | P43  | P43   | P43   |
| T44 | T44  | T44  | T44   | T44   |
| E45 | E45  | E45  | E45   | E45   |
| A46 | A46  | A46  | A46   | A46   |
| E47 | E47  | E47  | E47   | E47   |
| L48 | L48  | L48  | L48   | L48   |
| Q49 | Q49  | Q49  | Q49   | Q49   |
| D50 | D50  | D50  | D50   | D50   |
| M51 | M51  | M51  | M51   | M51   |
| I52 | I52  | I52  | I52   | I52   |
| N53 | N53  | N53  | N53   | N53   |
| E54 | E54  | E54  | E54   | E54   |
| V55 | V55  | V55  | V55   | V55   |
| D56 | D56  | D56  | D56   | D56   |
| A57 | A57  | A57  | A57   | A57   |
| D58 | D58  | D58  | D58   | D58   |
| G59 | G59  | G59  | G59   | G59   |
| N60 | N60  | N60  | N60   | N60   |
| G61 | G61  | G61  | G61   | G61   |
| T62 | T62  | T62  | T62   | T62   |
| I63 | I63  | I63  | I63   | I63   |
| D64 | D64  | D64  | D64   | D64   |
| F65 | F65  | F65  | F65   | F65   |
| P66 | P66  | P66  | P66   | P66   |
| E67 | E67  | E67  | E67   | E67   |
| F68 | F68  | F68  | F68   | F68   |
| L69 | L69  | L69  | L69   | L69   |
| T70 | T70  | T70  | T70   | T70   |
| M71 | M71  | M71  | M71   | M71   |
| M72 | M72  | M72  | M72   | M72   |
| A73 | A73  | A73  | A73   | A73   |
| R74 | R74  | R74  | R74   | R74   |

| CaM  | N53I | F89L | D129G | F141L |
|------|------|------|-------|-------|
| Q75  | Q75  | Q75  | Q75   | Q75   |
| M76  | M76  | M76  | M76   | M76   |
| K77  | K77  | K77  | K77   | K77   |
| D78  | D78  | D78  | D78   | D78   |
| T79  | T79  | T79  | T79   | T79   |
| D80  | D80  | D80  | D80   | D80   |
| S81  | S81  | S81  | S81   | S81   |
| E82  | E82  | E82  | E82   | E82   |
| E83  | E83  | E83  | E83   | E83   |
| E84  | E84  | E84  | E84   | E84   |
| I85  | I85  | I85  | I85   | I85   |
| R86  | R86  | R86  | R86   | R86   |
| E87  | E87  | E87  | E87   | E87   |
| A88  | A88  | A88  | A88   | A88   |
| F89  | F89  | F89  | F89   | F89   |
| R90  | R90  | R90  | R90   | R90   |
| V91  | V91  | V91  | V91   | V91   |
| F92  | F92  | F92  | F92   | F92   |
| D93  | D93  | D93  | D93   | D93   |
| K94  | K94  | K94  | K94   | K94   |
| D95  | D95  | D95  | D95   | D95   |
| G96  | G96  | G96  | G96   | G96   |
| N97  | N97  | N97  | N97   | N97   |
| G98  | G98  | G98  | G98   | G98   |
| Y99  | Y99  | Y99  | Y99   | Y99   |
| I100 | I100 | I100 | I100  | I100  |
| S101 | S101 | S101 | S101  | S101  |
| A102 | A102 | A102 | A102  | A102  |
| A103 | A103 | A103 | A103  | A103  |
| E104 | E104 | E104 | E104  | E104  |
| L105 | L105 | L105 | L105  | L105  |
| R106 | R106 | R106 | R106  | R106  |
| H107 | H107 | H107 | H107  | H107  |
| V108 | V108 | V108 | V108  | V108  |
| M109 | M109 | M109 | M109  | M109  |
| T110 | T110 | T110 | T110  | T110  |
| N111 | N111 | N111 | N111  | N111  |
| L112 | L112 | L112 | L112  | L112  |
| G113 | G113 | G113 | G113  | G113  |
| E114 | E114 | E114 | E114  | E114  |
| K115 | K115 | K115 | K115  | K115  |
| L116 | L116 | L116 | L116  | L116  |
| T117 | T117 | T117 | T117  | T117  |
| D118 | D118 | D118 | D118  | D118  |
| E119 | E119 | E119 | E119  | E119  |
| E120 | E120 | E120 | E120  | E120  |
| V121 | V121 | V121 | V121  | V121  |
| D122 | D122 | D122 | D122  | D122  |
| E123 | E123 | E123 | E123  | E123  |
| M124 | M124 | M124 | M124  | M124  |
| I125 | I125 | I125 | I125  | I125  |
| R126 | R126 | R126 | R126  | R126  |
| E127 | E127 | E127 | E127  | E127  |
| A128 | A128 | A128 | A128  | A128  |
| D129 | D129 | D129 | D129  | D129  |
| I130 | I130 | I130 | I130  | I130  |
| D131 | D131 | D131 | D131  | D131  |
| G132 | G132 | G132 | G132  | G132  |
| D133 | D133 | D133 | D133  | D133  |
| G134 | G134 | G134 | G134  | G134  |
| Q135 | Q135 | Q135 | Q135  | Q135  |
| V136 | V136 | V136 | V136  | V136  |
| N137 | N137 | N137 | N137  | N137  |
| Y138 | Y138 | Y138 | Y138  | Y138  |
| E139 | E139 | E139 | E139  | E139  |
| E140 | E140 | E140 | E140  | E140  |
| F141 | F141 | F141 | F141  | F141  |
| V142 | V142 | V142 | V142  | V142  |
| Q143 | Q143 | Q143 | Q143  | Q143  |
| M144 | M144 | M144 | M144  | M144  |
| M145 | M145 | M145 | M145  | M145  |
| T146 | T146 | T146 | T146  | T146  |
| A147 | A147 | A147 | A147  | A147  |
| K148 | K148 | K148 | K148  | K148  |

| KEY                                      |
|------------------------------------------|
| Clearly Resolved Cross-Peaks             |
| < 0.5 peak width deviation               |
| > 0.5, < 1 peak width deviation          |
| > 1 peak width deviation or peak missing |
| unable to resolve overlapped peaks       |

**Figure S5.** CaM sequence color coded by chemical shift perturbation relative to WT-CaM-CaN peptide complex at 80:1 [Ca<sup>2+</sup>]:[protein]. Disease associated point mutations highlighted in yellow. Amino acids shaded green denote cross-peaks where cross-peaks could be clearly attributed to a specific amino acid. Grey amino acids indicate cross-peaks overlapped to an extent where it was not possible to discern which amino-acid was altered. We note

were we were not overly surprised to observe overlapped cross peaks for amino acids that connected the CaM -N and -C domains, as others have indicated this helix a propensity for unwinding in solution (1,2). Unwound or disordered amino acids often have resonance frequencies that are similar and often overlapped.

1. Fiorin G, Biekofsky RR, Pastore A, Carloni P. Unwinding the helical linker of calcium-loaded calmodulin: A molecular dynamics study. *Proteins Struct Funct Genet.* 2005;61(4):829–39.
2. Wriggers W, Mehler E, Pitici F, Weinstein H, Schulten K. Structure and dynamics of calmodulin in solution. *Biophys J [Internet].* 1998;74(4):1622–39.

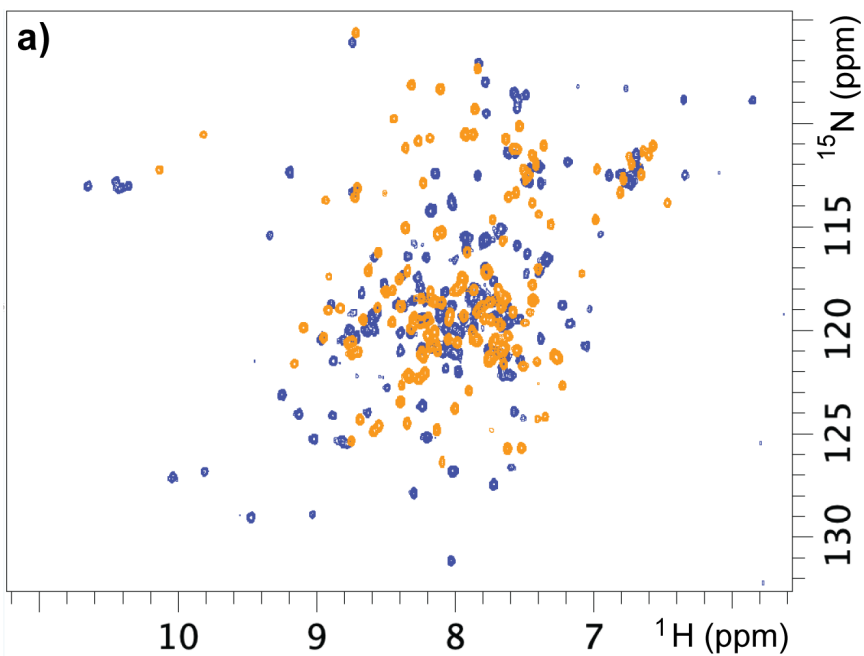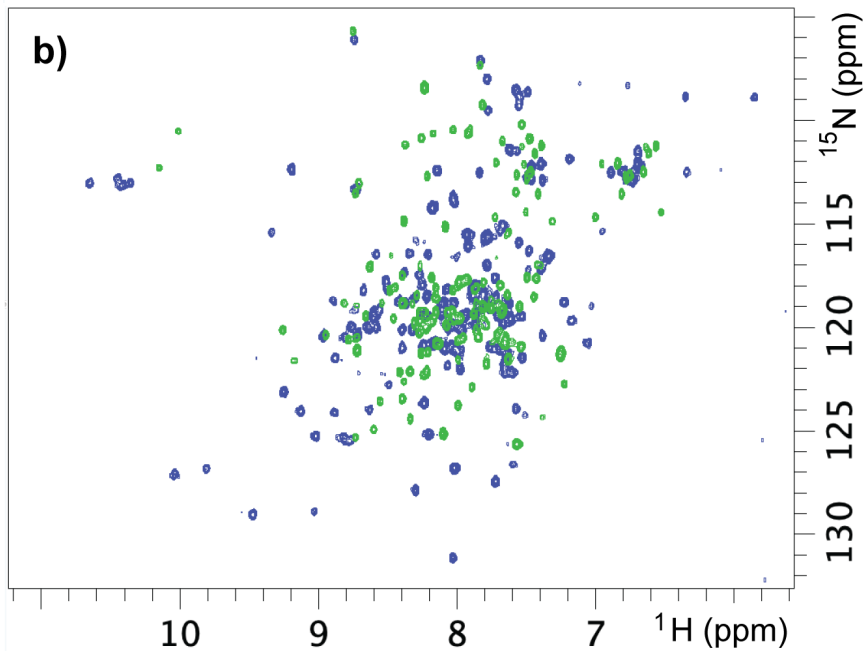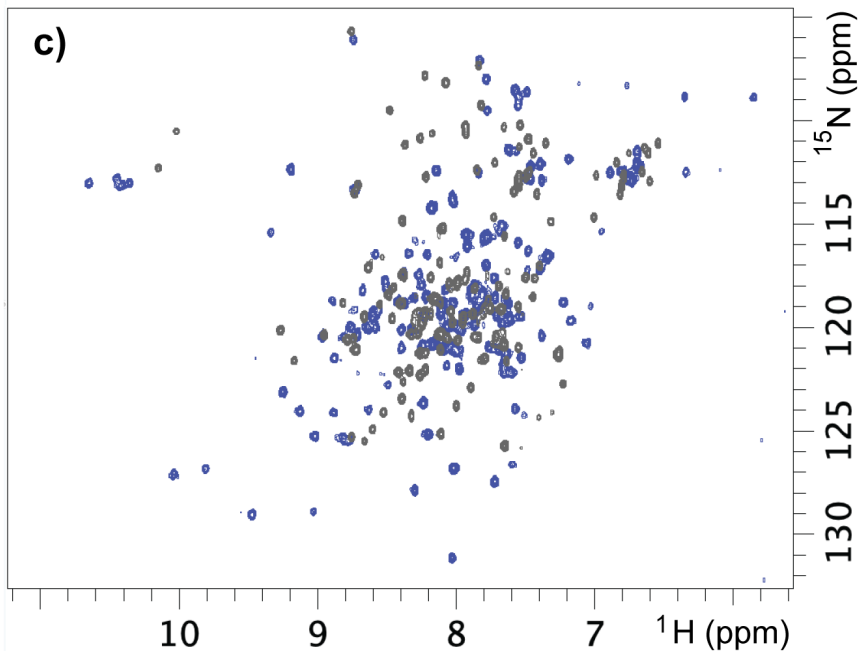

**Figure S6.** 2D  $^1\text{H}$   $^{15}\text{N}$  HSQC NMR spectra of  $\text{Ca}^{2+}$  free  $^{15}\text{N}$  enriched mutant CaM (**N53I**, **F89L** and **F141L**) in the presence of CaN peptide overlaid on spectra of **WT**  $\text{Ca}^{2+}$  CaM-CaN. The lack of similarity in the spectra confirm that the individual point mutations do not facilitate interaction between CaM and the traditional CaM binding region of CaN in the absence of  $\text{Ca}^{2+}$ .



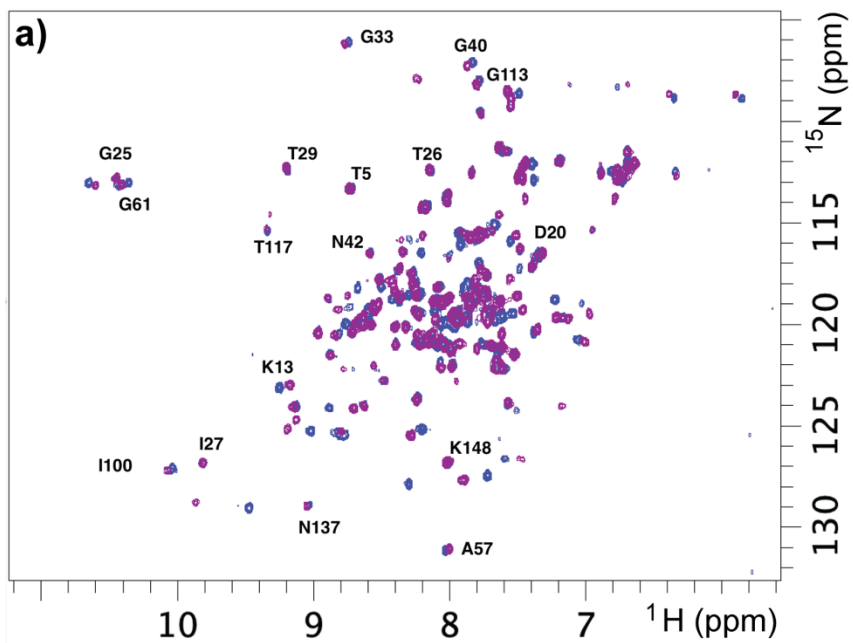

**Figure S7. a)** 2D  $^1\text{H}$   $^{15}\text{N}$  HSQC NMR spectra of  $\text{Ca}^{2+}$  free  $^{15}\text{N}$  enriched **D129G** CaM in the presence of CaN peptide overlaid on spectra of **WT**  $\text{Ca}^{2+}$  CaM-CaN. **b)** Overlapped chemical shifts mapped onto structure of CaM-CaN peptide complex in red (PDB ID 4Q5U) reveal that the spectral similarities are for amino acids not contained at the CaM-CaN binding interface. CaM shown in grey, CaN peptide shown in tan.

**b)**

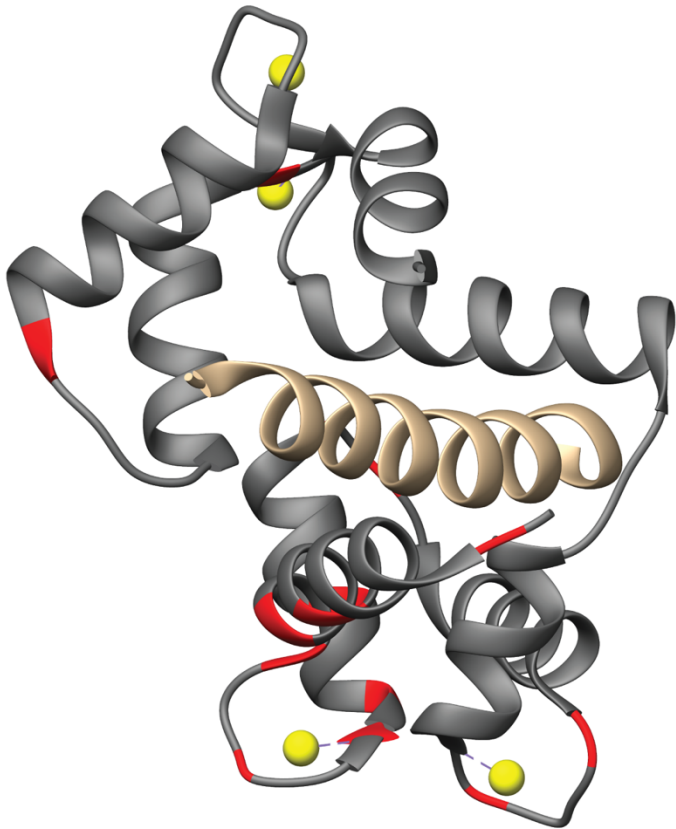

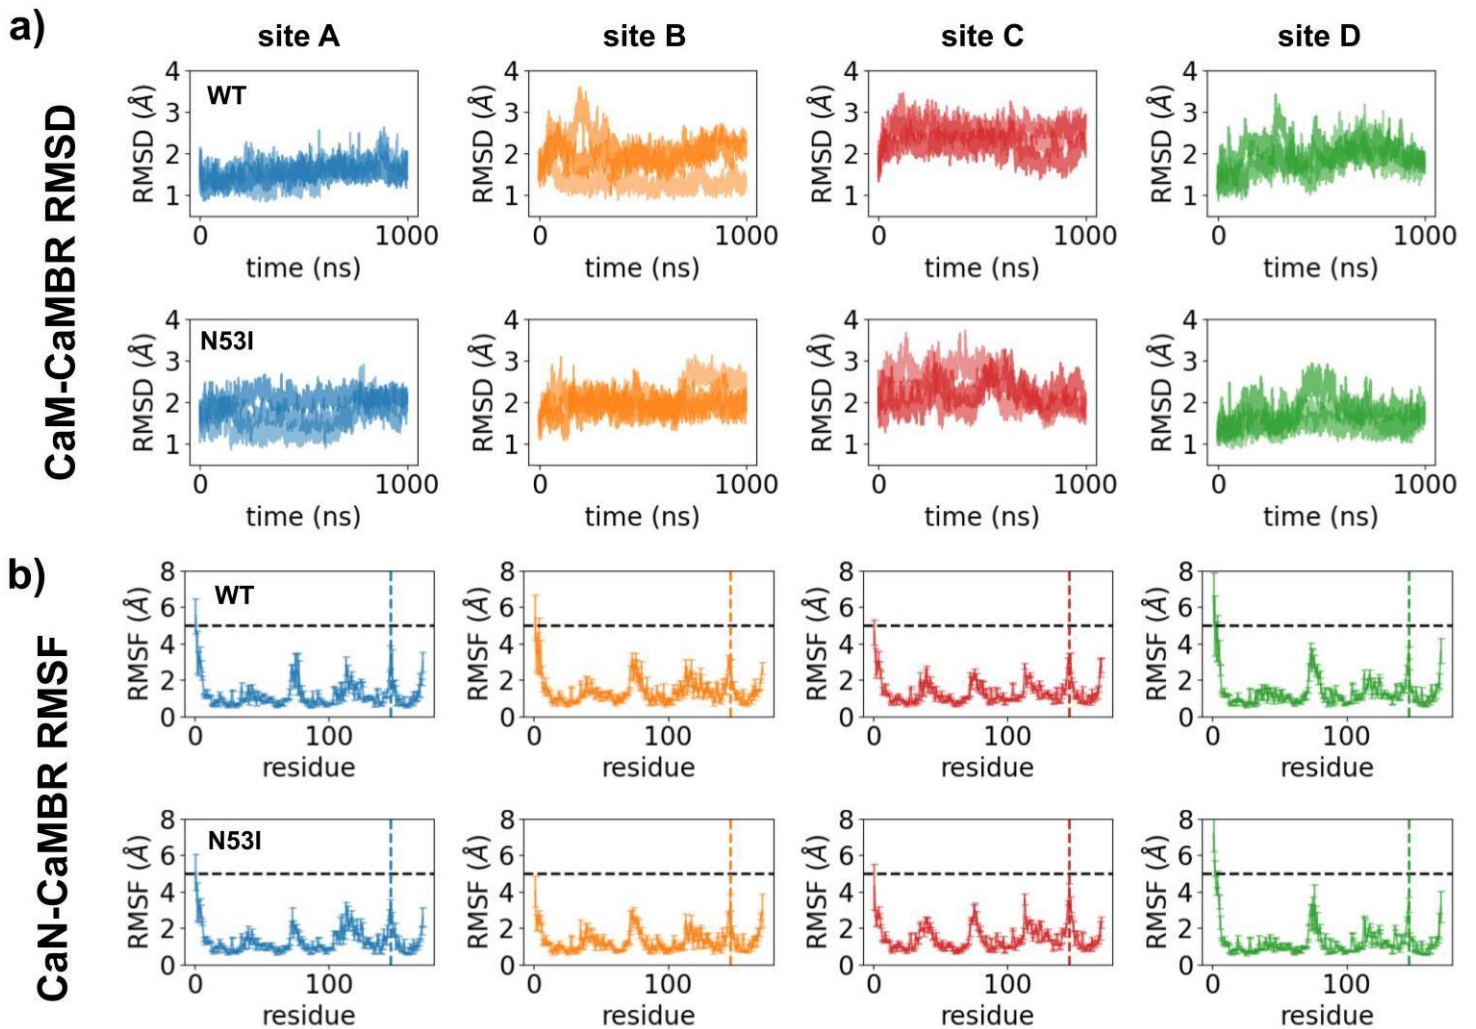

**Figure S8. Molecular Dynamic Simulation Analysis.** Plots of RMSD and RMSF for CaM binding region (CaMBR) of simulation contain CaMBR and distal helix for WT and N53I systems. **a)** Backbone RMSD of CaM WT (top) and N53I (bottom) at the four different distal helix binding sites. Data color-coded according to sites labeled in Figure 8 (**Site A**, **Site B**, **Site C**, **Site D**). Crystal structure of CaM-CaMBR (PDB: 4Q5U) was used as reference. **b)** RMSF of the CaM-CaN binding region of WT (top) and N53I (bottom) at the posited binding sites. Black dashed line denote 5 Å cutoff under which residues are deemed stable during the simulations.

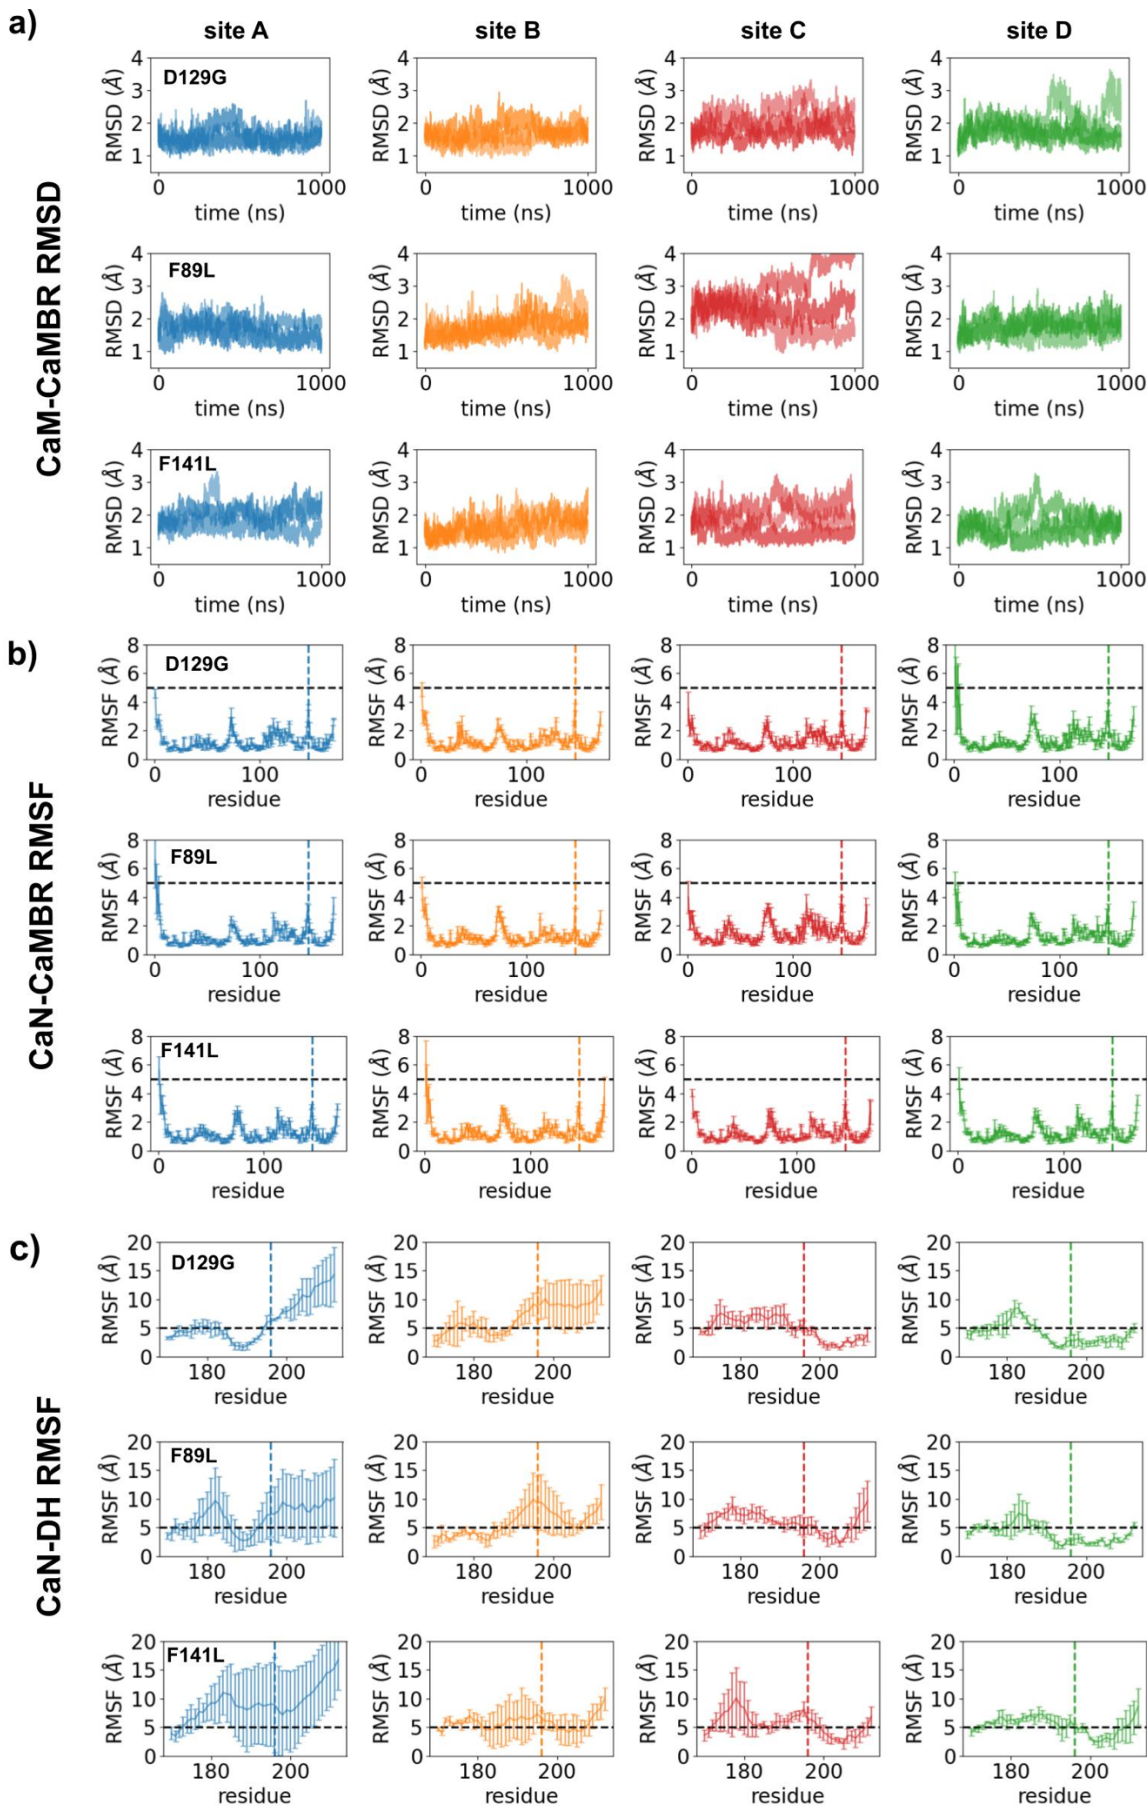

**Figure S9.** Analysis of molecular dynamic simulations for D129G, F89L and F141L CaM-CaN systems.

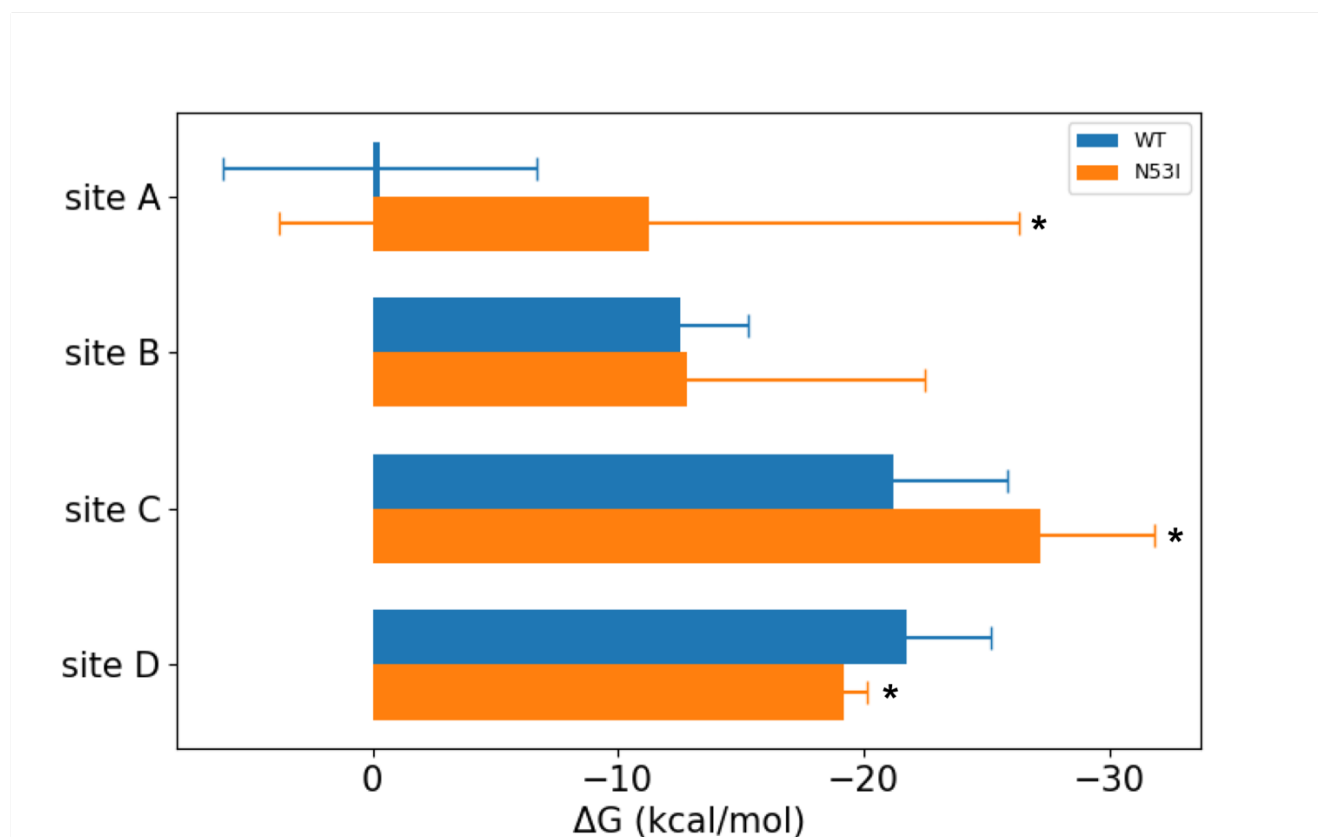

**Figure S10.** Approximate binding free energies between CaM and DH at four different sites computed via MM/GBSA. N53I indicates enhanced interaction between CaM and CaN-DH at sites A and C, with reduced interaction at site D. \* denotes statistical significance of  $p < 0.05$ .
